# Supplementary material for: Micro-Electromechanical Acoustic Resonator Coated with Polyethyleneimine Nanofibers for the Detection of Formaldehyde Vapor
Source: PubMed Central journal article supplement (PMC6187669; doi:10.3390/mi9020062), 2018-02-01
Supplement: micromachines-09-00062-s001.pdf [file micromachines-09-00062-s001.pdf]

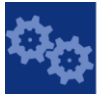

# Micro-Electromechanical Acoustic Resonator Coated with Polyethyleneimine Nanofibers for the Detection of Formaldehyde Vapor

Da Chen \*, Lei Yang, Wenhua Yu, Maozeng Wu, Wei Wang and Hongfei Wang

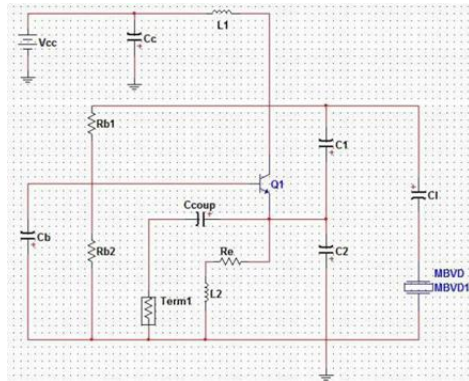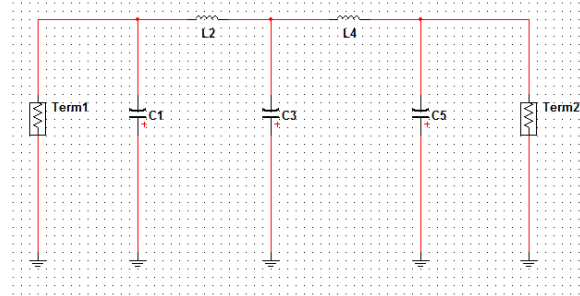

(a)

(b)

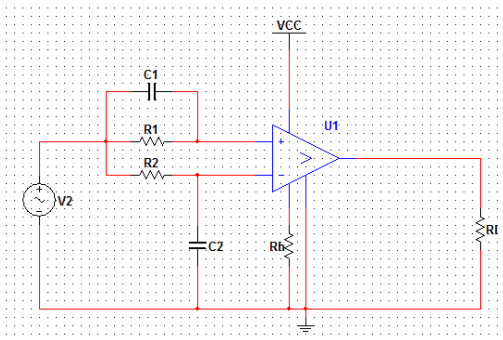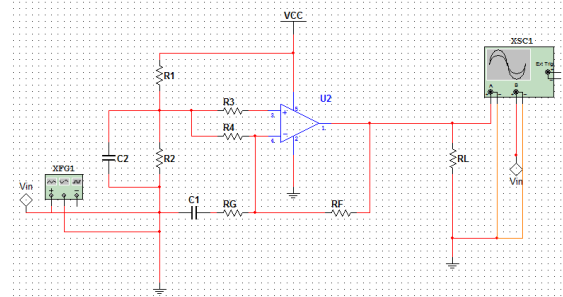

(c)

(d)

**Figure S1.** Details of the circuit design of the film bulk acoustic resonator (FBAR) testing system. (a) Colpitts oscillator of the FBAR devices; (b) low-pass filter (LPF); (c) the amplifier; (d) the waveform transformation.
